# Supplementary material for: Historical and contemporary genetic structure reveals recent fragmentation without loss of diversity in Mediterranean House Sparrow populations
Source: Research Square preprint supplement (doi:10.21203/rs.3.rs-8669756/v1), 2026-02-02
Supplement: Supplementary file 1 [file ae0644526157c519dbc20559.docx]

**SUPPLEMENTARY INFORMATION**

Table S1. OLD House sparrow samples collected ≤1950 conserved at the Museum of Natural Science of Barcelona.

| **Voucher number** | **Province** | **Locality** | **Collection year** |
| --- | --- | --- | --- |
| MZB 82-2571 | Barcelona | Castellbisbal | 1919 |
| MZB 82-2587 | Barcelona | Gavà | 1920 |
| MZB 82-2592 | Barcelona | Gavà | 1920 |
| MZB 82-2569 | Barcelona | Gavà | 1921 |
| MZB 82-2582 | Barcelona | Gavà | 1921 |
| MZB 82-2593 | Girona | Blanes | 1920 |
| MZB 82-2578 | Lleida | Cervera | 1920 |
| MZB 82-2586 | Lleida | Cervera | 1920 |
| MZB 82-2595 | Lleida | Folquer | 1950 |
| MZB 82-2575 | Tarragona | Amposta | 1920 |
| MZB 82-2589 | Tarragona | Amposta | 1920 |
| MZB 82-2590 | Tarragona | Amposta | 1920 |
| MZB 82-2599 | Tarragona | Amposta | 1920 |
| MZB 82-2574 | Tarragona | El Pla de Santa Maria | 1920 |
| MZB 82-2579 | Tarragona | El Pla de Santa Maria | 1920 |
| MZB 82-2584 | Tarragona | El Pla de Santa Maria | 1920 |
| MZB 82-2588 | Tarragona | El Pla de Santa María | 1920 |
| MZB 82-2597 | Tarragona | El Pla de Santa Maria | 1920 |
| MZB 82-2572 | Tarragona | La Cava (Deltebre) | 1920 |
| MZB 82-2573 | Tarragona | La Cava (Deltebre) | 1920 |
| MZB 82-2577 | Tarragona | La Cava (Deltebre) | 1920 |
| MZB 82-2580 | Tarragona | La Cava (Deltebre) | 1920 |
| MZB 82-2598 | Tarragona | La Cava (Deltebre) | 1920 |
| MZB 82-2594 | Tarragona | Sant Vicenç de Calders | 1920 |

Table S2. Genetic descriptors of the 12 microsatellite loci used. Na: total number of alleles; Ho and He: observed and expected heterozygosity, respectively; FIS: coefficient of inbreeding; ** p-value <0.01 for deviation from equilibrium of Hardy-Weinberg.

| **Microsatellite** | **Na** | **Ho** | **He** | **FIS** |
| --- | --- | --- | --- | --- |
| Pdo10 | 25 | 0.5568 | 0.9117 | 0.346** |
| Pdo19 | 24 | 0.5037 | 0.788 | 0.341** |
| Pdo5 | 27 | 0.5568 | 0.8588 | 0.304** |
| Pdo3 | 34 | 0.7348 | 0.9267 | 0.180** |
| Ase18 | 34 | 0.6287 | 0.9244 | 0.307** |
| Pdo30 | 20 | 0.5568 | 0.7004 | 0.200** |
| Pdo1 | 25 | 0.7765 | 0.8495 | 0.043** |
| Pdo27 | 21 | 0.7045 | 0.8617 | 0.161** |
| Pdo16 | 23 | 0.6856 | 0.9159 | 0.241** |
| Pdo47 | 29 | 0.6553 | 0.9116 | 0.267** |
| Pdo44 | 20 | 0.6704 | 0.8852 | 0.224** |
| Pdo17 | 35 | 0.5871 | 0.8827 | 0.323** |

Table S3. Estimated frequency of null alleles in each population of House Sparrow.

| **Population** | **Frequency nulls alleles** |
| --- | --- |
| OLD | 0.0761 |
| AM | 0.0705 |
| BCN | 0.1243 |
| BLA | 0.1188 |
| CAS | 0.0808 |
| CER | 0.1128 |
| DE | 0.0794 |
| FOL | 0.1747 |
| GAV | 0.0763 |
| LLA | 0.1091 |
| LLS | 0.1723 |
| PLA | 0.0533 |
| SAN | 0.1083 |
| TAR | 0.0863 |

Table S4. Pairwise FST values among populations. The table displays FST values (below the diagonal) and corresponding adjusted p-values (above the diagonal) for all population comparisons. Non-significant values (adj. p-value > 0.05) after FDR correction are highlighted with NS.

|  | **OLD** | **AM** | **DE** | **LLA** | **LLS** | **FOL** | **TAR** | **CER** | **PLA** | **SAN** | **GAV** | **BCN** | **CAS** | **BLA** |
| --- | --- | --- | --- | --- | --- | --- | --- | --- | --- | --- | --- | --- | --- | --- |
| **OLD** | 0 | 0 | 0 | 0 | 0 | 0 | 0 | 0 | 0 | 0 | 0 | 0 | 0 | 0 |
| **AM** | 0.0474 | 0 | 0.7133NS | 0.0007 | 0.0207 | 0.0002 | 0 | 0.0684NS | 0.0051 | 0.0004 | 0.0207 | 0.0002 | 0 | 0 |
| **DE** | 0.0440 | 0.0010 | 0 | 0.0169 | 0.0366 | 0.0010 | 0 | 0.0404 | 0.0134 | 0.0025 | 0.1209NS | 0.0144 | 0.0128 | 0 |
| **LLA** | 0.0429 | 0.0243 | 0.0195 | 0 | 0.0283 | 0 | 0 | 0.2086NS | 0.1732NS | 0 | 0.3228NS | 0.1730NS | 0 | 0 |
| **LLS** | 0.0443 | 0.0211 | 0.0219 | 0.0183 | 0 | 0.3849NS | 0 | 0.0207 | 0.0842 | 0.0272 | 0.0062 | 0.0310 | 0 | 0 |
| **FOL** | 0.0405 | 0.0363 | 0.0366 | 0.0313 | 0.0123 | 0 | 0 | 0.0368 | 0.0041 | 0.0027 | 0.0006 | 0 | 0 | 0 |
| **TAR** | 0.0842 | 0.0536 | 0.0461 | 0.0346 | 0.0449 | 0.0449 | 0 | 0.0015 | 0.0023 | 0 | 0 | 0.0002 | 0 | 0.0512NS |
| **CER** | 0.0280 | 0.0184 | 0.0235 | 0.0124 | 0.0291 | 0.0277 | 0.0334 | 0 | 0.1174NS | 0.0842NS | 0.1396NS | 0.0207 | 0 | 0.0007 |
| **PLA** | 0.0426 | 0.0209 | 0.0197 | 0.0086 | 0.0152 | 0.0256 | 0.0205 | 0.0151 | 0 | 0.0006 | 0.0056 | 0.1423NS | 0.0090 | 0.0002 |
| **SAN** | 0.0461 | 0.0277 | 0.0287 | 0.0301 | 0.0214 | 0.0287 | 0.0539 | 0.0188 | 0.0267 | 0 | 0.0199 | 0 | 0 | 0 |
| **GAV** | 0.0529 | 0.0208 | 0.0153 | 0.0080 | 0.0315 | 0.0372 | 0.0439 | 0.0176 | 0.0241 | 0.0223 | 0 | 0.0454 | 0.0002 | 0 |
| **BCN** | 0.0539 | 0.0331 | 0.0214 | 0.0098 | 0.0201 | 0.0357 | 0.0297 | 0.0246 | 0.0101 | 0.0388 | 0.0177 | 0 | 0 | 0.0006 |
| **CAS** | 0.0760 | 0.0316 | 0.0203 | 0.0349 | 0.0375 | 0.0411 | 0.0284 | 0.0385 | 0.0178 | 0.0472 | 0.0379 | 0.0298 | 0 | 0 |
| **BLA** | 0.0863 | 0.0672 | 0.0557 | 0.0362 | 0.0557 | 0.0562 | 0.0140 | 0.0410 | 0.0265 | 0.0671 | 0.0462 | 0.0271 | 0.0322 | 0 |

**Figures**

**Fig. S1** Representation of the Delta K values.


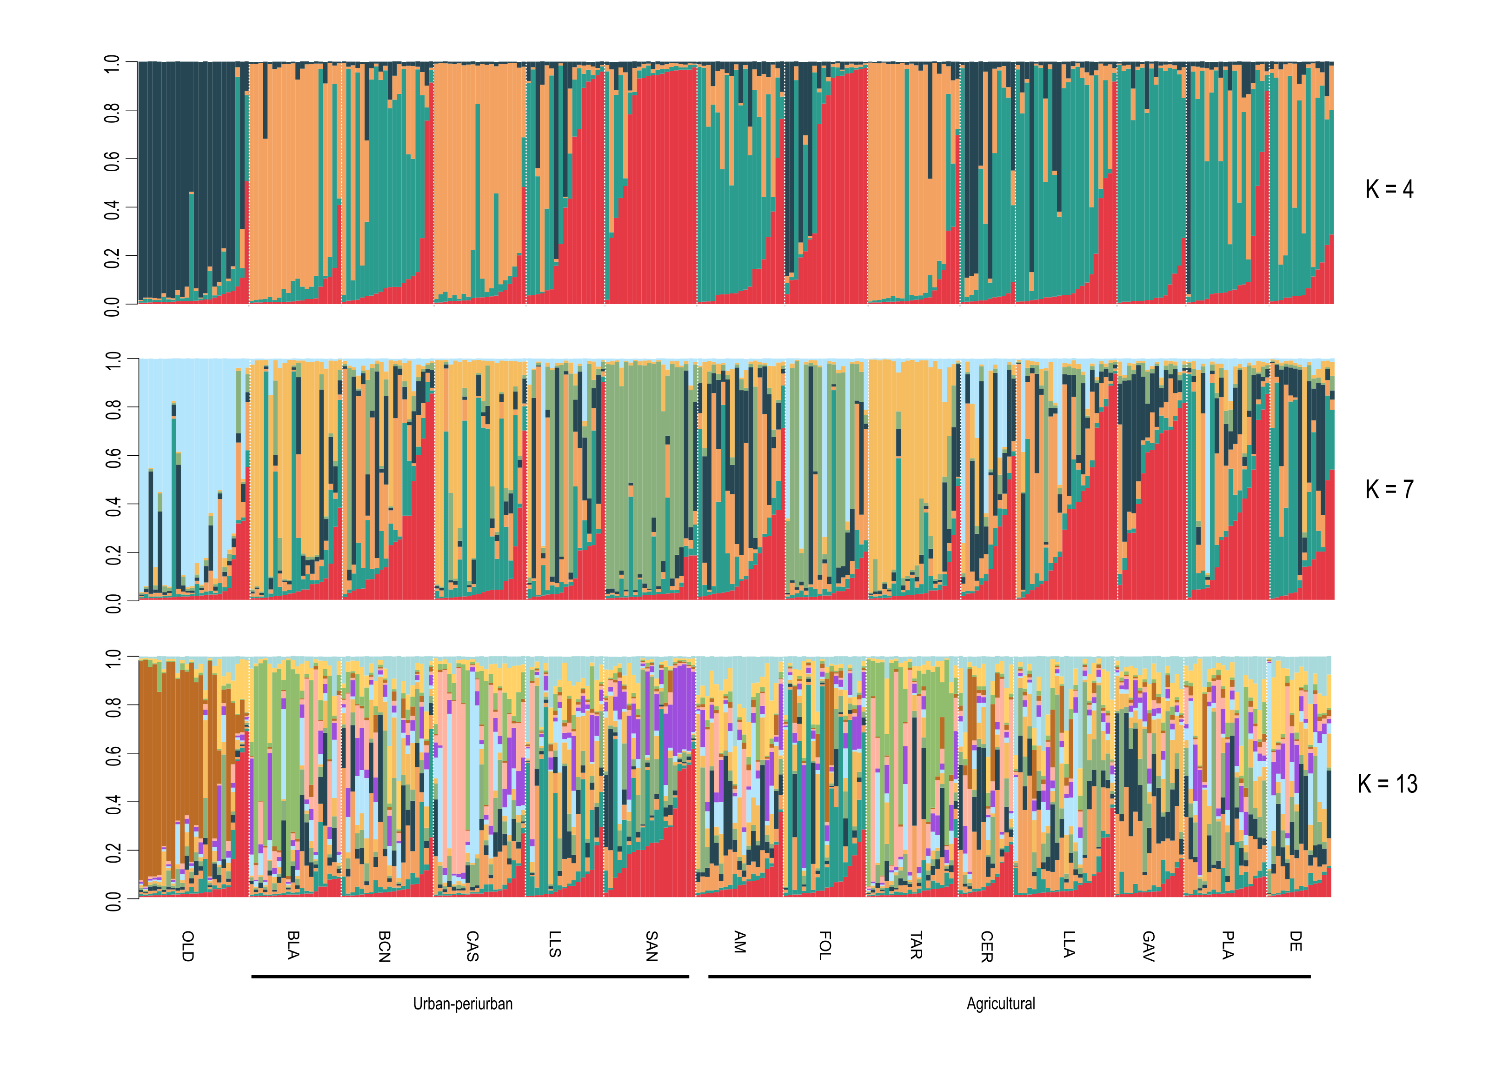


**Fig. S2** STRUCTURE results. Representation of the bar graphs of STRUCTURE results for the most likely number of clusters (K= 4, K= 7 and K=13) according to the Delta K.
